# Supplementary material for: Sodium alginate/soybean protein–epigallocatechin-3-gallate conjugate hydrogel beads: evaluation of structural, physical, and functional properties
Source: Royal Society of Chemistry journal article supplement (doi:10.1039/d1fo03099j), 2021-01-01
Supplement: d1fo03099j1.pdf [file d1fo03099j1.pdf]

## Supporting Information

*Miao Hu<sup>a</sup>, Xiaoqian Du<sup>a</sup>, Guannan Liu<sup>a</sup>, Yuyang, Huang<sup>b, c</sup>, Baokun Qi<sup>a, b\*</sup>, and Yang*

*Li<sup>a, b, d\*</sup>*

<sup>a</sup>College of Food Science, Northeast Agricultural University, Harbin, Heilongjiang

150030, China

<sup>b</sup>National Research Center of Soybean Engineering and Technology, Harbin,

Heilongjiang 150030, China

<sup>c</sup>College of Food Engineering, Harbin University of Commerce, Harbin, Heilongjiang,

150027, China

<sup>d</sup>Heilongjiang Green Food Science Research Institute, Harbin 150028, China

**\*Corresponding authors.**

Tel.: +86-0451-55190716, email: qibaokun22@163.com; yangli@neau.edu.cn

Table S1. Particle sizes of the S, SS, SSEN, and SSEC hydrogel beads formed using different vibrating nozzles

| Sample | 150/300 (mm)           | 200/400 (mm)            | 300/600 (mm)           | 450/900 (mm)           |
|--------|------------------------|-------------------------|------------------------|------------------------|
| SAH    | 0.51±0.18 <sup>a</sup> | 0.77±0.24 <sup>a</sup>  | 1.07±0.16 <sup>b</sup> | 1.68±0.35 <sup>c</sup> |
| SSH    | 0.58±0.18 <sup>a</sup> | 0.80±0.19 <sup>a</sup>  | 1.09±0.27 <sup>b</sup> | 1.43±0.13 <sup>c</sup> |
| SSENH  | 0.63±0.19 <sup>a</sup> | 0.69±0.15 <sup>a</sup>  | 0.98±0.21 <sup>b</sup> | 1.62±0.13 <sup>c</sup> |
| SSECH  | 0.69±0.16 <sup>a</sup> | 0.92±0.21 <sup>ab</sup> | 0.98±0.18 <sup>b</sup> | 1.52±0.30 <sup>c</sup> |

Note: Values with different superscripted letters in the same column are significantly different at  $p < 0.05$ . Uppercase letters represent significant differences between different particle sizes.
